# Supplementary material for: Genome Characteristics of Two Ranavirus Isolates from Mandarin Fish and Largemouth Bass
Source: MDPI journal article supplement (doi:10.3390/pathogens12050730), 2023-05-17
Supplement: s1 [file s1]

Table S2. Comparison of 6 ranavirus in *Siniperca chuatsi* and *Micropterus salmoides*

| Virus name | Nucleotide size (bp) | Identity% <sup>a</sup> | CG%   | Location             | host                                             |
|------------|----------------------|------------------------|-------|----------------------|--------------------------------------------------|
| SCRaV      | 99405                | 100                    | 52.09 | China Hubei          | Mandarin fish ( <i>Siniperca chuatsi</i> )       |
| MSRaV      | 99171                | 99.92                  | 52.09 | China Hubei          | Largemouth bass ( <i>Micropterus salmoides</i> ) |
| LMBV-A     | 99827                | 98.7                   | 51.93 | America Pennsylvania | Largemouth bass ( <i>Micropterus salmoides</i> ) |
| LMBV-P     | 99290                | 98.68                  | 51.9  | America Pennsylvania | Largemouth bass ( <i>Micropterus salmoides</i> ) |
| LMBV-G     | 99315                | 99.82                  | 52.09 | China Guangdong      | Largemouth bass ( <i>Micropterus salmoides</i> ) |
| MFRV       | 97946                | 99.88                  | 52.11 | China Jiangsu        | Mandarin fish ( <i>Siniperca chuatsi</i> )       |

<sup>a</sup>. The value of identities was product by BLASTN each compared to SCRaV.
